# Supplementary material for: Efficacy and Safety of Daptomycin versus Vancomycin for Bacteremia Caused by Methicillin-Resistant Staphylococcus aureus with Vancomycin Minimum Inhibitory Concentration > 1 µg/mL: A Systematic Review and Meta-Analysis
Source: MDPI journal article supplement (doi:10.3390/pharmaceutics14040714), 2022-03-27
Supplement: s1 [file s1]

# Supplementary Materials: Efficacy and Safety of Daptomycin versus Vancomycin for Bacteremia Caused by Methicillin-Resistant *Staphylococcus aureus* with Vancomycin Minimum Inhibitory Concentration >1 µg/mL: A Systematic Review and Meta-Analysis

Masaru Samura, Yuki Kitahiro, Sho Tashiro, Hiromu Moriyama, Yuna Hamamura, Isamu Takahata, Rina Kawabe, Yuki Enoki \*, Kazuaki Taguchi, Yoshio Takesue and Kazuaki Matsumoto

(A)

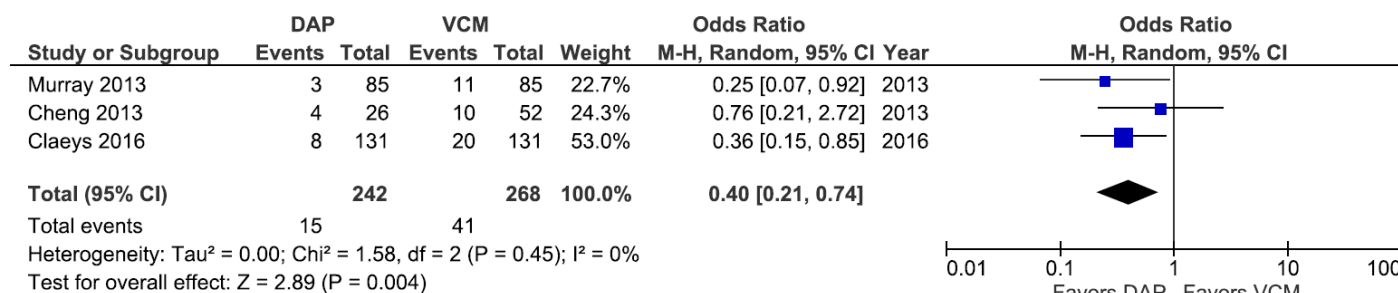

(B)

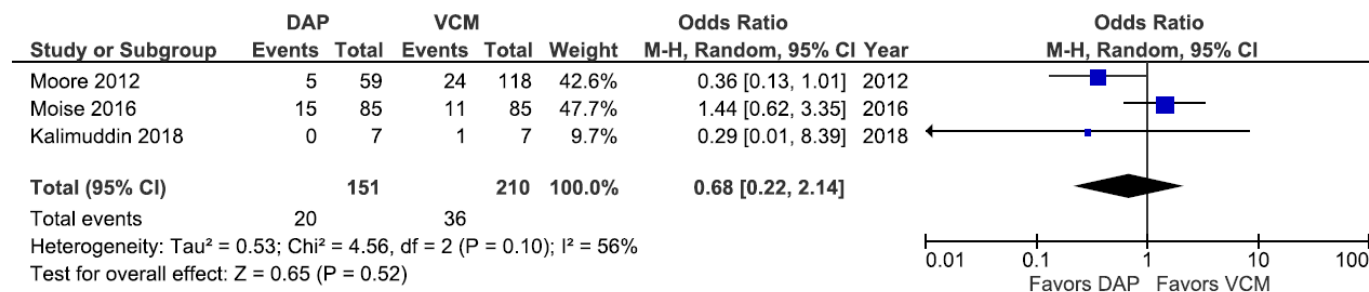

**Figure S1.** Forest plots of the 30-day and 60-day mortality rates for patients treated with DAP *versus* VCM for bacteremia caused by MRSA with VCM MIC > 1 µg/mL.

(A and B) Forest plots of the 30-day mortality rate (A) and 60-day mortality rate (B) of patients treated with DAP *versus* VCM in the studies evaluated. Symbols and abbreviations are as described for Figure 2.

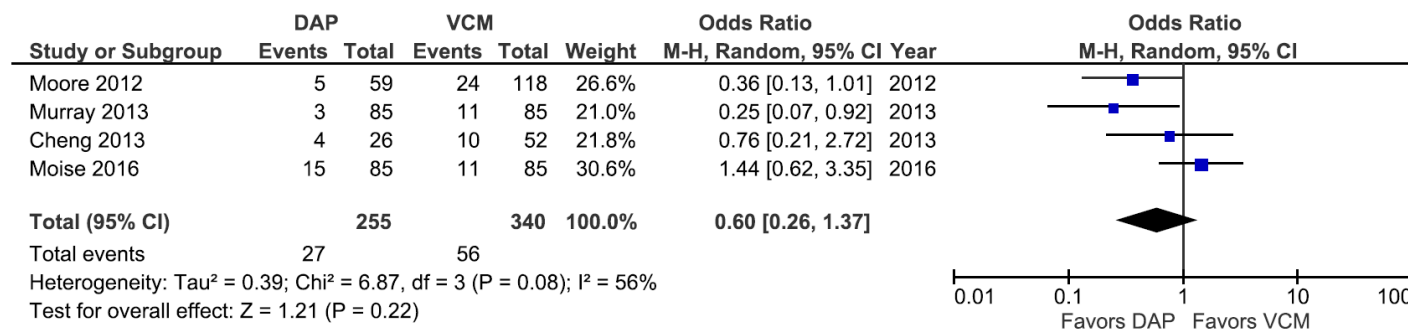

**Figure S2.** Forest plots of the mortality rates of patients treated with DAP *versus* VCM for bacteremia caused by MRSA with VCM MIC > 1 µg/mL determined by E-test or Microscan. Symbols and abbreviations are as described for Figure 2.

(A)

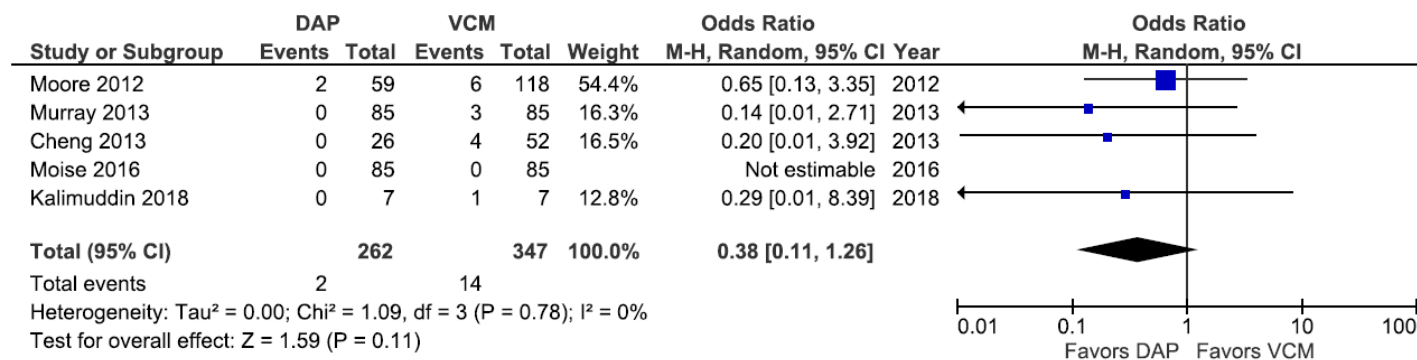

(B)

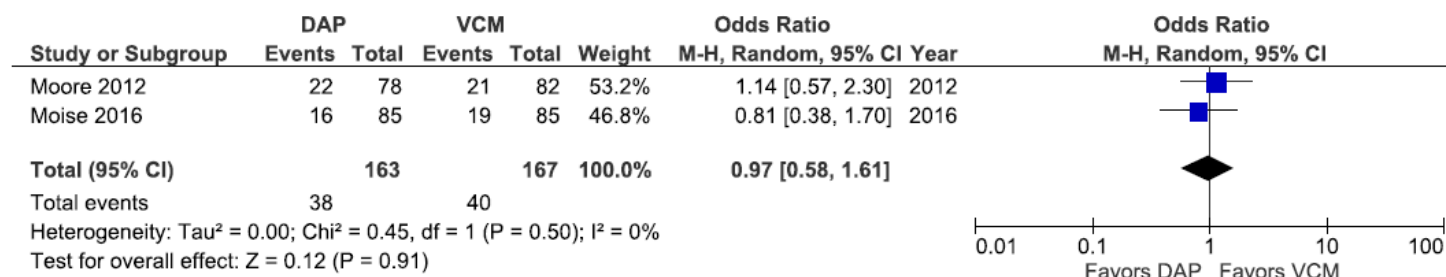

**Figure S3.** Forest plots of the recurrence and rehospitalization rates for patients treated with DAP *versus* VCM for bacteremia caused by MRSA with VCM MIC > 1 µg/mL.

(A and B) Forest plots of the recurrence rate (A) and rehospitalization rate (B) of patients treated with DAP *versus* VCM in the studies evaluated. Symbols and abbreviations are as described for Figure 2.

**Table S1.** Terms used and results of searches in PubMed.

| No. | Search terms                                      | Results |
|-----|---------------------------------------------------|---------|
| 1   | staphylococcus aureus                             | 122068  |
| 2   | methicillin-resistant staphylococcus aureus       | 32680   |
| 3   | acute bacterial skin and skin structure infection | 2044    |
| 4   | skin and skin structure infection                 | 138266  |
| 5   | complicated skin and skin structure infection     | 38198   |
| 6   | skin and soft tissue infection                    | 7114    |
| 7   | complicated skin and soft tissue infection        | 2467    |
| 8   | uncomplicated skin and soft tissue infection      | 162     |
| 9   | endocarditis                                      | 39924   |
| 10  | infective endocarditis                            | 39921   |
| 11  | infectious endocarditis                           | 8822    |
| 12  | bacterial endocarditis                            | 24600   |
| 13  | bacteremia                                        | 46225   |
| 14  | bacteraemia                                       | 46225   |
| 15  | bacillaemia                                       | 25      |
| 16  | bacillemia                                        | 42      |
| 17  | bloodstream infection                             | 29070   |
| 18  | daptomycin                                        | 3235    |
| 19  | lipopeptide                                       | 18679   |
| 20  | cubicin                                           | 3236    |
| 21  | vancomycin                                        | 30544   |
| 22  | teicoplanin                                       | 4074    |
| 23  | teichomycin                                       | 4075    |
| 24  | teicomycn                                         | 1       |

|    |                                                                                                                                              |        |
|----|----------------------------------------------------------------------------------------------------------------------------------------------|--------|
| 25 | targocid                                                                                                                                     | 4071   |
| 26 | glycopeptide                                                                                                                                 | 64027  |
| 27 | (#1) OR (#2) OR (#3) OR (#4) OR (#5) OR (#6) OR (#7) OR (#8) OR (#9) OR (#10) OR (#11) OR (#12) OR (#13) OR (#14) OR (#15) OR (#16) OR (#17) | 343005 |
| 28 | (#18) OR (#19) OR (#20)                                                                                                                      | 19787  |
| 29 | (#21) OR (#22) OR (#23) OR (#24) OR (#25) OR (#26)                                                                                           | 79556  |
| 30 | (#27) AND (#28) AND (#29)                                                                                                                    | 1799   |

**Table S2.** Terms used and results of searches in Web of Science.

| No. | Search terms                                      | Results |
|-----|---------------------------------------------------|---------|
| 1   | staphylococcus aureus                             | 137973  |
| 2   | methicillin-resistant staphylococcus aureus       | 29579   |
| 3   | acute bacterial skin and skin structure infection | 610     |
| 4   | skin and skin structure infection                 | 3819    |
| 5   | complicated skin and skin structure infection     | 940     |
| 6   | skin and soft tissue infection                    | 6830    |
| 7   | complicated skin and soft tissue infection        | 1010    |
| 8   | uncomplicated skin and soft tissue infection      | 213     |
| 9   | endocarditis                                      | 34840   |
| 10  | infective endocarditis                            | 12868   |
| 11  | infectious endocarditis                           | 2774    |
| 12  | bacterial endocarditis                            | 7243    |
| 13  | bacteremia                                        | 40130   |
| 14  | bacteraemia                                       | 40130   |

|    |                                                                                                                                                    |        |
|----|----------------------------------------------------------------------------------------------------------------------------------------------------|--------|
| 15 | bacillaemia                                                                                                                                        | 34     |
| 16 | bacillemia                                                                                                                                         | 81     |
| 17 | bloodstream infection                                                                                                                              | 12381  |
| 18 | daptomycin                                                                                                                                         | 4043   |
| 19 | lipopeptide                                                                                                                                        | 4279   |
| 20 | cubicin                                                                                                                                            | 65     |
| 21 | vancomycin                                                                                                                                         | 33916  |
| 22 | teicoplanin                                                                                                                                        | 4180   |
| 23 | teichomycin                                                                                                                                        | 41     |
| 24 | teicomycn                                                                                                                                          | 0      |
| 25 | targocid                                                                                                                                           | 5      |
| 26 | glycopeptide                                                                                                                                       | 8784   |
| 27 | (#1) OR (#2) OR (#3) OR (#4) OR (#5) OR (#6) OR (#7) OR (#8) OR<br>(#9) OR (#10) OR (#11) OR (#12) OR (#13) OR (#14) OR (#15) OR<br>(#16) OR (#17) | 210846 |
| 28 | (#18) OR (#19) OR (#20)                                                                                                                            | 7895   |
| 29 | (#21) OR (#22) OR (#23) OR (#24) OR (#25) OR (#26)                                                                                                 | 40849  |
| 30 | (#27) AND (#28) AND (#29)                                                                                                                          | 2071   |

**Table S3.** Terms used and results in searches of the Cochrane Library.

| No. | Search terms                                      | Results |
|-----|---------------------------------------------------|---------|
| 1   | staphylococcus aureus                             | 3343    |
| 2   | methicillin-resistant staphylococcus aureus       | 1149    |
| 3   | acute bacterial skin and skin structure infection | 218     |
| 4   | skin and skin structure infection                 | 673     |

|    |                                                                                                                                                    |      |
|----|----------------------------------------------------------------------------------------------------------------------------------------------------|------|
| 5  | complicated skin and skin structure infection                                                                                                      | 234  |
| 6  | skin and soft tissue infection                                                                                                                     | 703  |
| 7  | complicated skin and soft tissue infection                                                                                                         | 205  |
| 8  | uncomplicated skin and soft tissue infection                                                                                                       | 35   |
| 9  | endocarditis                                                                                                                                       | 602  |
| 10 | infective endocarditis                                                                                                                             | 372  |
| 11 | infectious endocarditis                                                                                                                            | 69   |
| 12 | bacterial endocarditis                                                                                                                             | 305  |
| 13 | bacteremia                                                                                                                                         | 2460 |
| 14 | bacteraemia                                                                                                                                        | 2459 |
| 15 | bacillaemia                                                                                                                                        | 1    |
| 16 | bacillemia                                                                                                                                         | 1    |
| 17 | bloodstream infection                                                                                                                              | 1055 |
| 18 | daptomycin                                                                                                                                         | 187  |
| 19 | lipopeptide                                                                                                                                        | 127  |
| 20 | cubicin                                                                                                                                            | 19   |
| 21 | vancomycin                                                                                                                                         | 1988 |
| 22 | teicoplanin                                                                                                                                        | 302  |
| 23 | teichomycin                                                                                                                                        | 0    |
| 24 | teicomycin                                                                                                                                         | 0    |
| 25 | targocid                                                                                                                                           | 7    |
| 26 | glycopeptide                                                                                                                                       | 268  |
| 27 | (#1) OR (#2) OR (#3) OR (#4) OR (#5) OR (#6) OR (#7) OR (#8) OR<br>(#9) OR (#10) OR (#11) OR (#12) OR (#13) OR (#14) OR (#15) OR<br>(#16) OR (#17) | 7462 |
| 28 | (#18) OR (#19) OR (#20)                                                                                                                            | 303  |



|    |                                                    |      |
|----|----------------------------------------------------|------|
| 29 | (#21) OR (#22) OR (#23) OR (#24) OR (#25) OR (#26) | 2307 |
| 30 | (#27) AND (#28) AND (#29)                          | 105  |

**Table S4.** Terms used and results in searches of ClinicalTrials.gov.

| No. | Search terms                                         | Results |
|-----|------------------------------------------------------|---------|
| 1   | staphylococcus aureus                                | 389     |
| 2   | methicillin-resistant staphylococcus aureus          | 183     |
| 3   | skin and skin structure infection                    | 179     |
| 4   | skin and soft tissue infection                       | 66      |
| 5   | endocarditis                                         | 98      |
| 6   | bacteraemia                                          | 346     |
| 7   | bloodstream infection                                | 188     |
| 8   | daptomycin                                           | 81      |
| 9   | lipopeptide                                          | 13      |
| 10  | vancomycin                                           | 270     |
| 11  | teicoplanin                                          | 19      |
| 12  | glycopeptide                                         | 19      |
| 13  | (#1) OR (#2) OR (#3) OR (#4) OR (#5) OR (#6) OR (#7) | 1050    |
| 14  | (#8) OR (#9)                                         | 94      |
| 15  | (#10) OR (#11) OR (#12)                              | 299     |
| 16  | (#13) AND (#14) AND (#10)                            | 15      |
| 17  | (#13) AND (#14) AND (#11)                            | 1       |
| 18  | (#13) AND (#14) AND (#12)                            | 0       |

**Table S5.** Adverse drug reactions with DAP and VCM in selected studies.

| Adverse Events         | Moore 2012    |                                | Murray 2013   |               | Claeys 2016               |                | Moise 2016                   |                                | Cubist 2018   |               | Kalimuddin 2018 |              |
|------------------------|---------------|--------------------------------|---------------|---------------|---------------------------|----------------|------------------------------|--------------------------------|---------------|---------------|-----------------|--------------|
|                        | DAP<br>(n=59) | VCM<br>(n=118)                 | DAP<br>(n=85) | VCM<br>(n=85) | DAP<br>(n=131)            | VCM<br>(n=131) | DAP<br>(n=85)                | VCM<br>(n=85)                  | DAP<br>(n=19) | VCM<br>(n=17) | DAP<br>(n=7)    | VCM<br>(n=7) |
| Serious adverse events | —             | —                              | —             | —             | —                         | —              | —                            | —                              | 3<br>(15.8%)  | 4<br>(23.5%)  | 3<br>(42.9%)    | 4<br>(57.1%) |
| CPK elevation          | 1<br>(1.7%)   | —                              | 1<br>(1.2%)   | —             | 3* <sub>1</sub><br>(2.3%) | 0<br>(0.0%)    | 2<br>(2.4%)                  | 0<br>(0.0%)                    | 2<br>(10.5%)  | 0<br>(0.0%)   | 1<br>(14.3%)    | 0<br>(0.0%)  |
| Nephrotoxicity         | —             | 13/63* <sub>2</sub><br>(20.6%) | —             | 22<br>(25.9%) | 0<br>(0.0%)               | 12<br>(9.2%)   | 6/64* <sub>2</sub><br>(9.4%) | 14/62* <sub>2</sub><br>(22.6%) | 0<br>(0.0%)   | 4<br>(23.5%)  | 1<br>(14.3%)    | 0<br>(0.0%)  |
| Dermatologic           | —             | —                              | —             | —             | —                         | —              | —                            | —                              | 0<br>(0.0%)   | 4<br>(23.5%)  | 0<br>(0.0%)     | 3<br>(42.9%) |
| Gastrointestinal       | —             | —                              | —             | —             | —                         | —              | —                            | —                              | 7<br>(36.8%)  | 3<br>(17.6%)  | 1<br>(14.3%)    | 0<br>(0.0%)  |

CPK, creatinine phosphokinase; DAP, daptomycin; VCM, vancomycin.

\*1 Included two patients with myopathy.

\*2 Patients on intermittent dialysis treatment and patients with acute kidney injury at baseline were excluded from the analysis.
